RESEARCH ARTICLE

# Rapid Antiretroviral Therapy Initiation for Women in an HIV-1 Prevention Clinical Trial Experiencing Primary HIV-1 Infection during Pregnancy or Breastfeeding

Susan Morrison<sup>1</sup>, Grace John-Stewart<sup>1,2,3</sup>, John J. Egessa<sup>4</sup>, Sezi Mubezi<sup>5</sup>, Sylvia Kusemererwa<sup>4</sup>, Dennis K. Bii<sup>6</sup>, Nulu Bulya<sup>5</sup>, Francis Mugume<sup>7</sup>, James D. Campbell<sup>8</sup>, Jonathan Wangisi<sup>4</sup>, Elizabeth A. Bukusi<sup>1,6</sup>, Connie Celum<sup>1,2,3</sup>, Jared M. Baeten<sup>1,2,3\*</sup>, Partners PrEP Study Team<sup>†</sup>

**1** Department of Global Health, University of Washington, Seattle, WA, United States of America, **2** Department of Medicine, University of Washington, Seattle, WA United States of America, **3** Department of Epidemiology, University of Washington, Seattle, United States of America, **4** The AIDS Support Organization, Kampala, Uganda, **5** Infectious Disease Institute, Makerere University, Kampala, Uganda, **6** Center for Microbiology Research, Kenya Medical Research Institute, Nairobi, Kenya, **7** Kabwohe Clinical Research Center, Kabwohe, Uganda, **8** Centers for Disease Control and Prevention, Entebbe, Uganda

<sup>†</sup> Membership of the Partners PrEP Study Team is listed in the Acknowledgments.  
\* [jbaeten@u.washington.edu](mailto:jbaeten@u.washington.edu)

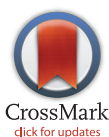

**OPEN ACCESS**

**Citation:** Morrison S, John-Stewart G, Egessa JJ, Mubezi S, Kusemererwa S, Bii DK, et al. (2015) Rapid Antiretroviral Therapy Initiation for Women in an HIV-1 Prevention Clinical Trial Experiencing Primary HIV-1 Infection during Pregnancy or Breastfeeding. *PLoS ONE* 10(10): e0140773. doi:10.1371/journal.pone.0140773

**Editor:** Anil Kumar, University of Missouri-Kansas City, UNITED STATES

**Received:** July 14, 2015

**Accepted:** September 30, 2015

**Published:** October 15, 2015

**Copyright:** © 2015 Morrison et al. This is an open access article distributed under the terms of the [Creative Commons Attribution License](https://creativecommons.org/licenses/by/4.0/), which permits unrestricted use, distribution, and reproduction in any medium, provided the original author and source are credited.

**Data Availability Statement:** All relevant data are within the paper.

**Funding:** This work was supported by the Bill & Melinda Gates Foundation (grant OPP47674), <http://www.gatesfoundation.org/>. The funders had no role in study design, data collection and analysis, decision to publish, or preparation of the manuscript.

**Competing Interests:** The authors have declared that no competing interests exist.

## Abstract

During an HIV-1 prevention clinical trial in East Africa, we observed 16 cases of primary HIV-1 infection in women coincident with pregnancy or breastfeeding. Nine of eleven pregnant women initiated rapid combination antiretroviral therapy (ART), despite having CD4 counts exceeding national criteria for ART initiation; breastfeeding women initiated ART or replacement feeding. Rapid ART initiation during primary HIV-1 infection during pregnancy and breastfeeding is feasible in this setting.

## Introduction

Primary HIV-1 infection carries a high risk of maternal-to-child HIV-1 transmission (MTCT) when occurring during pregnancy or breastfeeding [1, 2]. HIV-1 acquisition during pregnancy is often not identified because of limited repeat HIV-1 testing, although high HIV-1 incidence during this period has been observed [2, 3, 4]. Initiation of antiretroviral therapy (ART) reduces the risk of MTCT; however, few countries have policies which specifically address primary HIV-1 infection during pregnancy or breastfeeding or prioritize treatment in this situation. Women with primary HIV-1 infection are likely to have higher CD4 counts and thus not qualify for combination ART under many national guidelines for routine ART initiation, or may not be prioritized for urgent initiation where policies for universal treatment during pregnancy (Option B/B+) have been adopted.

Randomized clinical trials of novel HIV-1 prevention strategies frequently enroll reproductive-age women at high HIV-1 risk, who may also become pregnant during study follow-up. Frequent, scheduled HIV-1 testing presents an opportunity to identify HIV-1 acquisition, potentially permitting initiation of combination ART to reduce the risk of MTCT. However, HIV-1 prevention trial sites do not typically provide direct HIV-1 care, instead referring HIV-1 seroconverters to local institutions.

## Methods

Within a randomized clinical trial of PrEP for HIV-1 prevention, we identified 16 cases of HIV-1 acquisition among pregnant or postpartum women and, working with local institutions, were able to rapidly initiate ART, including for women with CD4 counts above the thresholds for routine ART initiation.

Between July 2008 and December 2012, we conducted the Partners PrEP Study, a randomized, placebo-controlled trial of daily oral tenofovir and emtricitabine/tenofovir PrEP among 4747 HIV-1 uninfected members of HIV-1 serodiscordant couples in Kenya and Uganda. Eligibility criteria, study procedures, and trial results have been reported previously [5]. Participants were tested monthly for HIV-1 using paired rapid tests, confirmed by HIV-1 EIA if positive, and female participants had monthly urine pregnancy testing. The study medication was discontinued when pregnancy was identified, but pregnant women continued with monthly visits, including HIV-1 testing. A primary criterion in site selection was established linkages with HIV-1 care centers. Participants who acquired HIV-1 were referred to local partnering HIV-1 care centers, including government health facilities and non-governmental organizations (NGOs), where ART was provided according to national guidelines during and after study participation. Women who acquired HIV-1 while pregnant or breastfeeding were referred expediently with direct communication with the partnering institutions.

## Ethics Statement

The Partners PrEP Study was approved by the University of Washington Human Subjects Review Committee and ethics review committees for each study site, specifically the Moi University Institutional Research and Ethics Committee and Indiana University Human Subjects Office (Eldoret, Kenya site), Office of Research Administration, Kenya Medical Research Institute Ethics Review Committee and the University of California—San Francisco Committee for Human Research (Kisumu, Kenya site), Kenyatta National Hospital Ethics and Research Committee (Nairobi and Thika, Kenya sites), the National HIV/AIDS Research Committee of the Uganda National Council for Science and Technology (Jinja, Kabwohe, and Kampala, Uganda sites), and the Uganda Virus Research Institute Science and Ethics Committee and the Centers for Disease Control and Prevention Human Research Protection Office (Mbale and Tororo, Uganda sites). All study participants provided written informed consent to participate in English or their local language, and the consent documents were approved by the overseeing ethics committees.

## Results

During the study, 70 women seroconverted to HIV-1, 16 of whom (23%) experienced primary HIV-1 infection concurrently with pregnancy or breastfeeding. Of these, 11 (16%) were pregnant at or within three months after the time of HIV-1 seroconversion, and five (7%) were breastfeeding at the time of seroconversion (Table 1). Cases occurred at six of nine study sites.

Among the 11 women with concurrent pregnancy and seroconversion, nine initiated combination ART (82%). Eight of the nine women had CD4 counts  $>350$  cells/ $\mu$ L. One participant

**Table 1. Participants with primary HIV-1 infection identified during pregnancy or breastfeeding.**

| Country date                                     | Age | Timing of HIV-1 seroconversion                 | CD4 count (cells/ $\mu$ L) | Immediate intervention to reduce HIV-1 transmission risk, time to intervention *                                | Infant outcome                                                    |
|--------------------------------------------------|-----|------------------------------------------------|----------------------------|-----------------------------------------------------------------------------------------------------------------|-------------------------------------------------------------------|
| <b>HIV-1 seroconversion during pregnancy</b>     |     |                                                |                            |                                                                                                                 |                                                                   |
| Kenya Aug 2009                                   | 23  | 9 2/7 weeks prior to pregnancy identification  | 978                        | Combination ART (zidovudine, lamivudine, lopinavir/ritonavir), 27 days                                          | Term live birth. HIV-1 DNA PCR negative at 6 weeks of age         |
| Kenya Oct 2010                                   | 23  | 3 5/7 weeks of pregnancy                       | 1053                       | Referred for combination ART but lost to follow-up until 19 2/7 weeks of pregnancy, then zidovudine monotherapy | Preterm birth, neonatal death                                     |
| Uganda Nov 2010                                  | 27  | 34 6/7 weeks of pregnancy                      | 604                        | Combination ART (zidovudine, lamivudine, nevirapine), 11 days                                                   | Term live birth. HIV-1 DNA PCR negative at 8 weeks of age         |
| Uganda Jan 2011                                  | 28  | 31 4/7 weeks of pregnancy                      | 662                        | Combination ART (zidovudine, lamivudine, nevirapine), 19 days                                                   | Term live birth. HIV-1 DNA PCR negative at 4 months of age        |
| Uganda Jan 2011                                  | 30  | 14 4/7 weeks of pregnancy                      | 473                        | Combination ART (zidovudine, lamivudine, lopinavir/ritonavir), 43 days                                          | Term live birth. HIV-1 DNA PCR negative at 13 months of age       |
| Uganda Jan 2011                                  | 25  | 15 6/7 weeks of pregnancy                      | 824                        | Declined ART                                                                                                    | Induced abortion                                                  |
| Uganda Mar 2011                                  | 25  | 13 5/7 weeks of pregnancy                      | 306                        | Combination ART (zidovudine, lamivudine, tenofovir), 11 days                                                    | Term live birth. HIV-1 DNA PCR negative at 6 weeks of age         |
| Uganda Mar 2011                                  | 34  | 25 1/7 weeks of pregnancy                      | 459                        | Combination ART (zidovudine, lamivudine, efavirenz), 26 days                                                    | Term live birth. HIV-1 DNA PCR negative at 7 months of age        |
| Uganda Mar 2011                                  | 27  | 12 3/7 weeks prior to pregnancy identification | 900                        | Combination ART (zidovudine, lamivudine, efavirenz), 13 days                                                    | Term live birth. HIV-1 DNA PCR negative at 6 months of age        |
| Uganda Jul 2011                                  | 24  | 35 2/7 weeks of pregnancy                      | 529                        | Combination ART (zidovudine, lamivudine, nevirapine), 2 days                                                    | Term live birth. HIV-1 DNA PCR negative within 1 week of age      |
| Uganda Sep 2012                                  | 37  | 27 1/7 weeks of pregnancy                      | 797                        | Combination ART (lamivudine, tenofovir, efavirenz), 7 days                                                      | Term live birth. HIV-1 DNA PCR negative at 2 months of age        |
| <b>HIV-1 seroconversion during breastfeeding</b> |     |                                                |                            |                                                                                                                 |                                                                   |
| Uganda Jun 2010                                  | 26  | Breastfeeding 14 weeks                         | 963                        | Replacement feeding, 5 days                                                                                     | HIV-1 DNA PCR negative within 2 weeks of maternal seroconversion  |
| Uganda Apr 2012                                  | 28  | Breastfeeding 12 weeks                         | 524                        | Combination ART (zidovudine, lamivudine, nevirapine), 10 days                                                   | HIV-1 DNA PCR negative within 2 weeks of maternal seroconversion. |
| Uganda Jul 2012                                  | 27  | Breastfeeding 12 months                        | 422                        | N/A. Infant HIV-1 infected                                                                                      | HIV-1 DNA PCR positive within 2 weeks of maternal seroconversion  |
| Uganda Sep 2012                                  | 32  | Breastfeeding 17 months                        | 738                        | Breastfeeding cessation, 0 days                                                                                 | HIV-1 DNA PCR negative 7 months after maternal seroconversion     |
| Uganda Oct 2012                                  | 29  | Breastfeeding 12 months                        | 813                        | Breastfeeding cessation, 0 days                                                                                 | HIV-1 DNA PCR negative within 2 weeks of maternal seroconversion  |

\* Time to intervention is measured from the date of the first positive rapid HIV-1 test until antiretroviral therapy is initiated. For those who seroconverted to HIV-1 prior to pregnancy, time to intervention is measured from the date of the first positive pregnancy test until antiretroviral therapy is initiated.

doi:10.1371/journal.pone.0140773.t001

declined therapy and terminated her pregnancy, and a second was lost to follow-up prior to ART initiation. For the nine pregnant participants starting combination ART, the median time to initiation was 13 days (range 2–43 days). All nine infants underwent HIV-1 DNA PCR testing after birth and results were negative.

Four of the five participants who were breastfeeding at the time of maternal seroconversion received immediate intervention to prevent MTCT, individualized according to infant age, existing national guidelines, available services, and wishes of the parents. One participant

rapidly initiated combination ART while continuing to breastfeed her three month-old infant. One chose replacement feeding and received intensive support. Two weaned older infants (12 and 17 months) and received nutrition counseling. These four infants had negative initial HIV-1 DNA PCR results. The final participant's infant had HIV-1 DNA PCR testing at the time of maternal seroconversion and was found to be already HIV-1 infected; breastfeeding was continued in addition to referral of the infant for care.

## Discussion

In summary, within this randomized clinical trial of an HIV-1 prevention intervention, we prospectively identified 16 pregnant or breastfeeding women with primary HIV-1 infection. Study personnel worked closely with participants and local partners to ensure successful linkage to care and ART. Ten women initiated combination ART, six within two weeks of the positive HIV-1 test, and nine of the ten within 30 days.

At the time of this study, Kenya and Uganda national guidelines recommended combination ART for those whose CD4 counts was  $<200\text{--}350$  cells/mm<sup>3</sup> (with the higher CD4 threshold phased in during the study period), with short course therapy for the prevention of MTCT recommended for women who did not meet criteria for full ART initiation, and without specific provision for ART during primary HIV-1 for prevention of MTCT. Thus, ART initiation in all ten cases in our study was for an indication beyond the scope of national guidelines. In one case, ART was not initiated until 43 days after HIV-1 seroconversion was detected due to initial reluctance of the partnering institution to operate beyond national guidelines.

While the research setting we describe is unique, our findings are generalizable to maternal and child health programs in which primary HIV-1 infection may be identified among initially-HIV-1-seronegative women offered retesting later in pregnancy during antenatal care visits or postpartum at maternal, infant, and child health clinics. The response we observed from local providers suggests that ART initiation in primary infection during pregnancy among mothers at high risk of transmitting HIV-1 to their infants was well received. Retesting in pregnancy is recommended by WHO in settings of generalized epidemics [6], although this may be infrequent in practice and thus, women with primary infection may have delayed diagnosis and receive routine, rather than urgent treatment. WHO-recommended Option B/B+, which includes combination ART for all HIV-1 infected pregnant women regardless of CD4 count, is being implemented in several African countries, and would include ART initiation for women with primary HIV-1 [7].

An HIV-1 prevention clinical trial, in which HIV-1 testing is frequent, allows detection of primary HIV-1 infection and presents an opportunity for secondary prevention through rapid initiation of combination ART to prevent infant HIV-1 infection. Our results demonstrate that collaboration between a clinical trial site and partnering HIV-1 care providers can result in pregnant and postpartum women promptly initiating ART during primary HIV-1 infection. Increased expediency is recommended and could be achievable, particularly in settings where on-site provision of antiretroviral therapy is available. In this cohort, nearly 25% of women who seroconverted to HIV-1 were pregnant or breastfeeding during primary infection, underscoring the importance of HIV-1 prevention strategies which are safe and effective for reproductive age women. HIV-1 prevention trials should incorporate mechanisms to ensure women with concurrently-identified pregnancy or breastfeeding and primary HIV-1 infection are offered ART rapidly to reduce the high risk of vertical transmission.

## Acknowledgments

We are grateful to the study participants and the referral HIV-1 care clinics.

**Partners PrEP Study Team (the corresponding author serves as the lead author for this group; [jbaeten@uw.edu](mailto:jbaeten@uw.edu)):**

**University of Washington Coordinating Center and Central Laboratories**, Seattle, USA: Connie Celum (principal investigator, protocol co-chair), Jared M. Baeten (medical director, protocol co-chair), Deborah Donnell (protocol statistician), Robert W. Coombs, Lisa Frenkel, Craig W. Hendrix, Jairam Lingappa, M. Juliana McElrath.

**Study sites and site principal investigators:**

Eldoret, Kenya (Moi University, Indiana University): Kenneth Fife, Edwin Were; Kabwohe, Uganda (Kabwohe Clinical Research Center): Elioda Tumwesigye; Jinja, Uganda (Makerere University, University of Washington): Patrick Ndase, Elly Katabira; Kampala, Uganda (Makerere University): Elly Katabira, Allan Ronald; Kisumu, Kenya (Kenya Medical Research Institute, University of California San Francisco): Elizabeth Bukusi, Craig Cohen; Mbale, Uganda (The AIDS Support Organization, CDC-Uganda): Jonathan Wangisi, James Campbell, Jordan Tappero; Nairobi, Kenya (University of Nairobi, University of Washington): James Kiarie, Carey Farquhar, Grace John-Stewart; Thika, Kenya (University of Nairobi, University of Washington): Nelly Rwamba Mugo; Tororo, Uganda (CDC-Uganda, The AIDS Support Organization): James Campbell, Jordan Tappero, Jonathan Wangisi.

Data management was provided by DF/Net Research, Inc. (Seattle, USA) and site laboratory oversight was provided by Contract Laboratory Services (University of the Witwatersrand, Johannesburg, South Africa).

Study medication was donated by Gilead Sciences.

## Author Contributions

Conceived and designed the experiments: S. Morrison JMB. Performed the experiments: S. Morrison GJS JJE S. Mubezi SK DKB NB FM JDC JW EAB CC JMB. Analyzed the data: S. Morrison GJS JJE S. Mubezi SK DKB NB FM JDC JW EAB CC JMB. Wrote the paper: S. Morrison GJS JJE S. Mubezi SK DKB NB FM JDC JW EAB CC JMB.

## References

1. Lockman S, Creek T. Acute maternal HIV infection during pregnancy and breast-feeding: substantial risk to infants. *J Infect Dis* 2009; 200:667–669. doi: [10.1086/605124](https://doi.org/10.1086/605124) PMID: [19627246](https://pubmed.ncbi.nlm.nih.gov/19627246/)
2. Drake AL, Wagner A, Richardson B, John-Stewart G. Incident HIV during pregnancy and postpartum and risk of mother-to-child HIV transmission: A systematic review and meta-analysis. *PLoS Med*. 2014; 11(2): e1001608. doi: [10.1371/journal.pmed.1001608](https://doi.org/10.1371/journal.pmed.1001608) PMID: [24586123](https://pubmed.ncbi.nlm.nih.gov/24586123/)
3. Kinuthia J, Kiarie JN, Farquhar C, Richardson B, Nduati R, Mbori-Ngacha D, et al. Cofactors for HIV-1 incidence during pregnancy and postpartum period. *Curr HIV Res* 2010; 8:510–514. PMID: [20946093](https://pubmed.ncbi.nlm.nih.gov/20946093/)
4. Mugo NR, Heffron R, Donnell D, Wald A, Were EO, Rees H, et al. Increased risk of HIV-1 transmission in pregnancy: a prospective study among African HIV-1 serodiscordant couples. *AIDS* 2011; 21:21.
5. Baeten JM, Donnell D, Ndase P, Mugo NR, Campbell JD, Wangisi J, et al. Antiretroviral prophylaxis for HIV prevention in heterosexual men and women. *N Engl J Med* 2012; 367:399–410. doi: [10.1056/NEJMoa1108524](https://doi.org/10.1056/NEJMoa1108524) PMID: [22784037](https://pubmed.ncbi.nlm.nih.gov/22784037/)
6. World Health Organization. Delivering HIV test results and messages for re-testing and counselling in adults. Geneva: World Health Organization; 2010. Available: [www.who.int/hiv/pub/vct/hiv\\_re\\_testing/en/](http://www.who.int/hiv/pub/vct/hiv_re_testing/en/).
7. World Health Organization. Programmatic Update: Use of Antiretroviral Drugs for Treating Pregnant Women and Preventing HIV Infection in Infants. Geneva: World Health Organization; 2012. Available: [www.who.int/hiv/pub/mtct/programmatic\\_update2012/en/](http://www.who.int/hiv/pub/mtct/programmatic_update2012/en/).
